# Supplementary material for: Electrostatic Self-Assembled Synthesis of Amorphous/Crystalline g-C3N4 Homo-Junction for Efficient Photocatalytic H2 Production with Simultaneous Antibiotic Degradation
Source: MDPI journal article supplement (doi:10.3390/nano13222964), 2023-11-17
Supplement: s1 [file s1]

# Electrostatic Self-Assembled Synthesis of Amorphous/ Crystalline g-C<sub>3</sub>N<sub>4</sub> Homo-Junction for Efficient Photocatalytic H<sub>2</sub> Production with Simultaneous Antibiotic Degradation

Yilin Pan <sup>1</sup>, Kai Qiao <sup>1</sup>, Chuangyu Ning <sup>2</sup>, Xin Wang <sup>2,3,4</sup>, Zhiquan Liu <sup>1,\*</sup>  
and Zhihong Chen <sup>1,\*</sup>

<sup>1</sup> Key Laboratory for Water Quality and Conservation of the Pearl River Delta, Guangzhou University, Guangzhou 511370, China

<sup>2</sup> International Academy of Optoelectronics at Zhaoqing, South China Normal University, Liyuan Street, Zhaoqing 526238, China; wangxin@scnu.edu.cn (X.W.)

<sup>3</sup> Institute of Carbon Neutrality, Zhejiang Wanli University, Ningbo 315100, China

<sup>4</sup> National Center for International Research on Green Optoelectronics, South China Academy of Advanced Optoelectronics, South China Normal University, Guangzhou 510006, China

\* Correspondence: zhiquanliu@gzhu.edu.cn (Z.L.); chenzhihong@gzhu.edu.cn (Z.C.)

## Table of contents

**Table S1.** Application of g-C<sub>3</sub>N<sub>4</sub>-based photocatalysts in photocatalytic H<sub>2</sub> production.

**Scheme S1.** Hydrogen measurement system schematic.

**Figure S1.** The ACN/CCN-2 photocatalytic H<sub>2</sub> production at different dosages of Pt.

**Figure S2.** The doping amount of Pt after the reaction of ACN (a), CCN(b) , ACN/CCN-2 (c).

**Figure S3.** (a) The photocatalytic H<sub>2</sub> evolution performance of ACN/CCN-2 in pure water and (b) TOC removal of CIP in the photocatalytic reaction.

**Figure S4.** The HPLC-MS identical intermediates of the degradation of CIP with ACN/CCN-2 under visible light irradiation.

**Figure S5.** The Pt content on the ACN/CCN-2 1st run (a) and 2nd run (b).

**Table S1.** Application of g-C<sub>3</sub>N<sub>4</sub>-based photocatalysts in photocatalytic H<sub>2</sub> production.

| Photocatalyst                                                          | Preparation                     | Light source                   | Solution Systems | Hydrogen evolution /pollutants degradation rate | Ref       |
|------------------------------------------------------------------------|---------------------------------|--------------------------------|------------------|-------------------------------------------------|-----------|
| GQDs/TCN                                                               | Calcination                     | 300 W Xe (320 nm ≤ λ ≤ 780 nm) | 10 ppm CIP       | 1 μmol/g·h / 70%                                | [45]      |
| C/N-TiO <sub>2</sub> @C <sub>3</sub> N <sub>4</sub> NTs                | Pyrolysis                       | 300 W Xe (λ ≥ 420 nm)          | 20ppm RhB        | 9.67 μmol/g·h / 70%                             | [46]      |
| Ag/g-C <sub>3</sub> N <sub>4</sub> -Ag-Ag <sub>3</sub> PO <sub>4</sub> | Photoassisted isoelectric point | 300 W Xe                       | 10ppm LEV        | 55.41 μmol/g·h / 90%                            | [16]      |
| Pt@g-C <sub>3</sub> N <sub>4</sub> nanorod                             | Calcination                     | 300 W Xe (λ ≥ 420 nm)          | 10ppm 2,4-DNP    | 96 μmol/g·h / 100%                              | [47]      |
| CDs/CdS/gCN                                                            | Hydrothermal                    | 300 W Xe (λ ≥ 420 nm)          | 10 ppm BPA       | 130 μmol/g·h / 70%                              | [48]      |
| 2D BP/2D C <sub>3</sub> N <sub>4</sub>                                 | Liquid-phase exfoliation        | 300 W Xe (λ > 400 nm)          | 10 ppm BPA       | 259 μmol/g·h / 88%                              | [11]      |
| g-C <sub>3</sub> N <sub>4</sub> nanotubes                              | Hydrothermal-calcination        | 300 W Xe (λ > 400 nm)          | 10 ppm BPA       | 272.6 μmol/g·h / 92%                            | [49]      |
| g-C <sub>3</sub> N <sub>4</sub> (oyster shell)                         | Single-step biomediated         | 125W Hg lamp (λ> 400 nm)       | 10 vol% TEOA     | 87 μmol/g·h                                     | [50]      |
| Re-CNN/CNN/Ox-CNN                                                      | Calcination                     | 300W Xe (λ> 420 nm)            | 10 vol% TEOA     | 127.05 μmol/g·h                                 | [51]      |
| UDCN-30                                                                | Calcination                     | 150W Xe (λ> 420 nm)            | 10 vol% TEOA     | 190 μmol/g·h                                    | [18]      |
| O-doped g-C <sub>3</sub> N <sub>4</sub>                                | One step template               | 300 W Xe (λ< 460 nm)           | 20 vol%TEOA      | 203.66 μmol/h                                   | [52]      |
| ACN/CCN                                                                | Electrostatic self-assembly     | 300 W Xe (AM1.5)               | 500 ppm CIP      | 162.5 μmol/h / 12.6%                            | This work |

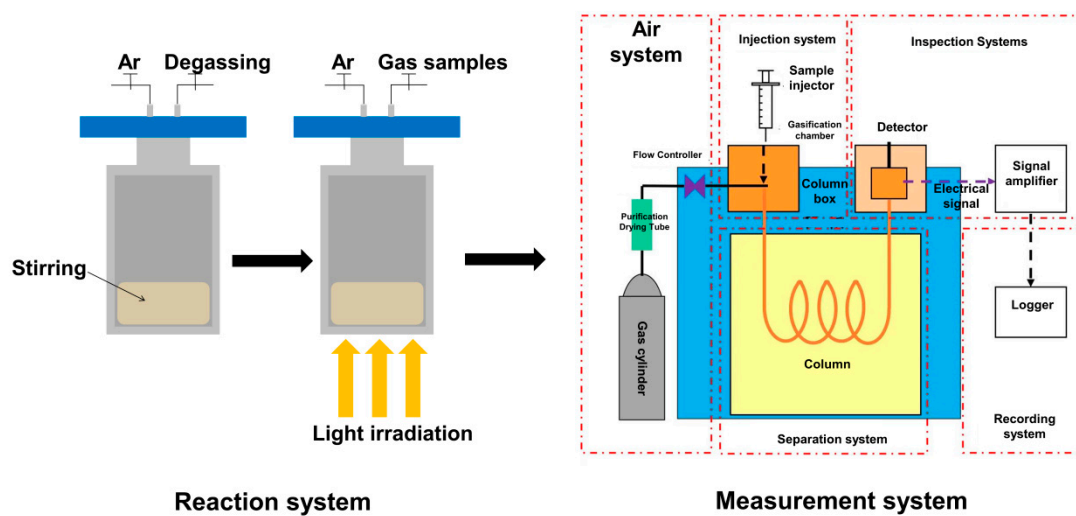

Scheme S1. Hydrogen measurement system schematic.

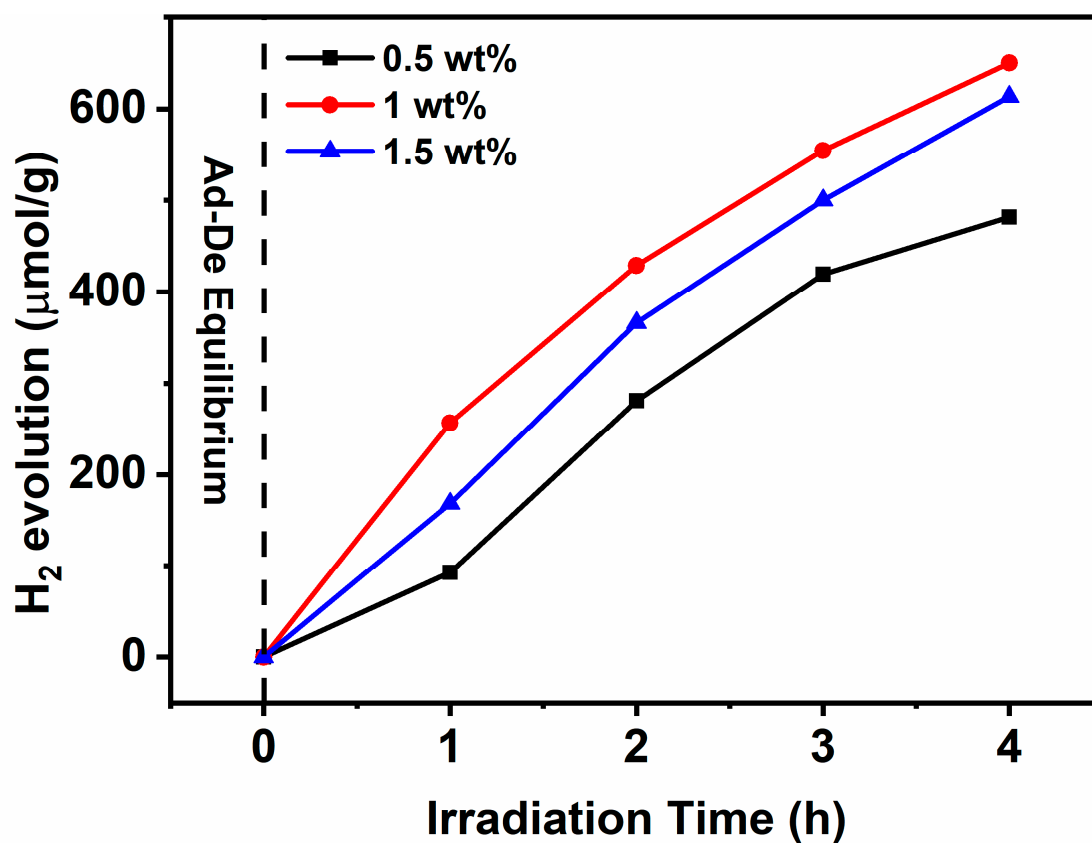

Figure S1. The ACN/CCN-2 photocatalytic  $H_2$  production at different dosages of Pt.

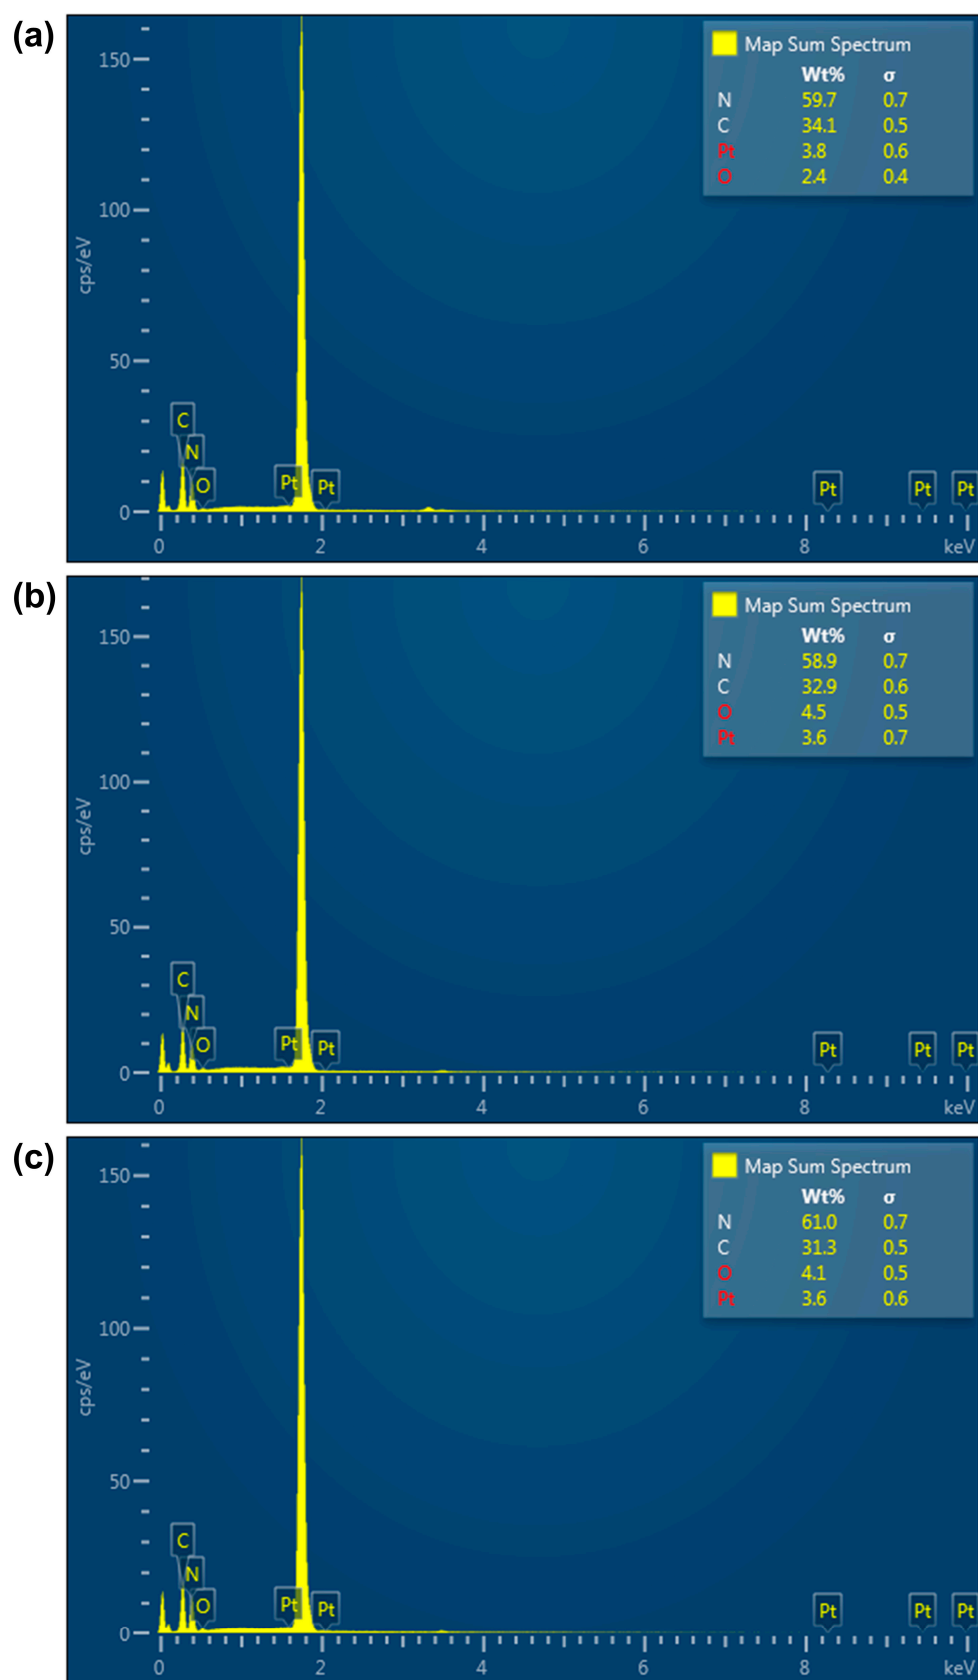

**Figure S2.** The doping amount of Pt after the reaction of ACN (a), CCN (b), ACN/CCN-2 (c).

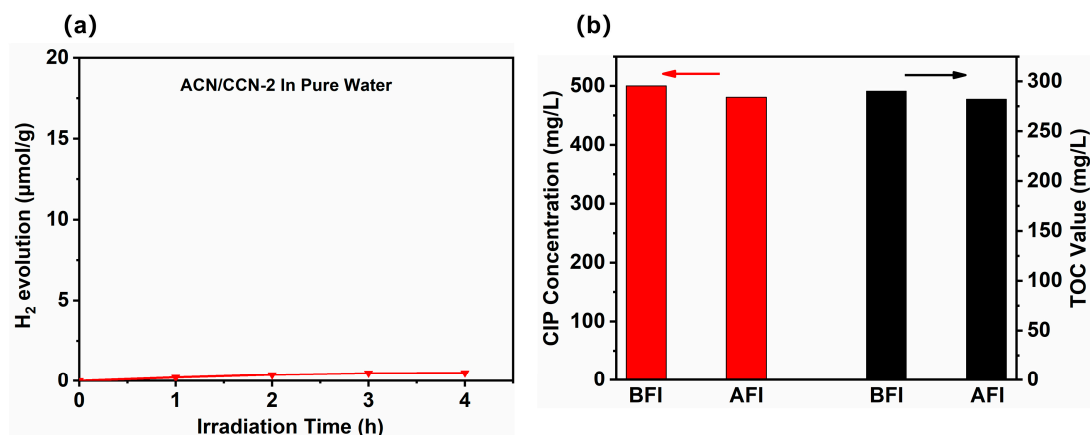

BFI = Before irradiation, AFI = After irradiation

**Figure S3.** (a) The photocatalytic H<sub>2</sub> evolution performance of ACN/CCN-2 in pure water and (b) TOC removal of CIP in the photocatalytic reaction.

### Calculation of CO<sub>2</sub> selectivity

BCIP : CIP concentration before irradiation

ACIP : CIP concentration after irradiation

BTOC : TOC value before irradiation

ATOC : TOC value after irradiation

TTOC : Theoretical TOC value after irradiation =  $\frac{ACIP \times BTOC}{BCIP}$

CO<sub>2</sub> selectivity =  $\frac{BTOC - ATOC}{BTOC - TTOC} \times 100\%$

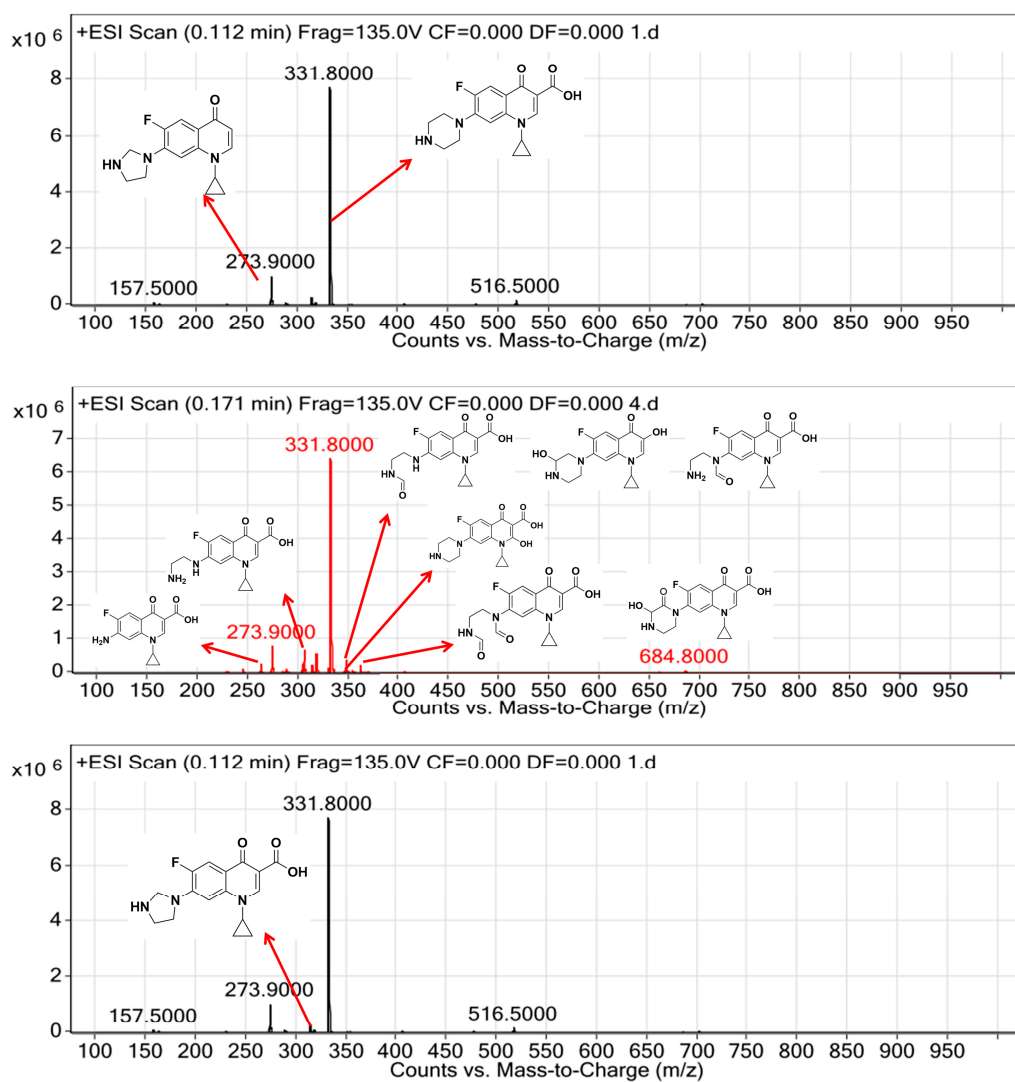

**Figure S4.** The HPLC-MS identical intermediates of the degradation of CIP with ACN/CCN-2 under visible light irradiation.

(a)

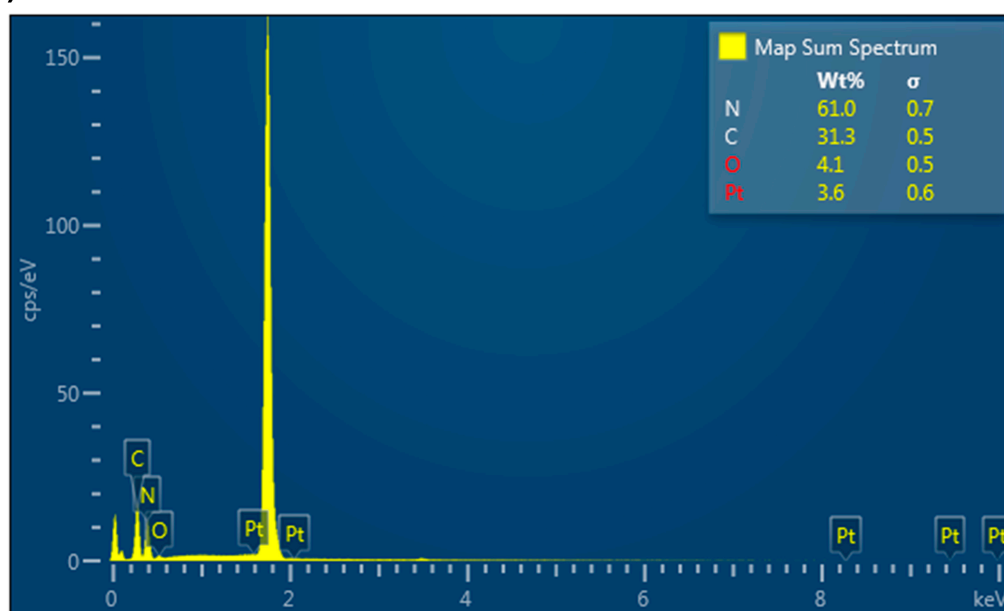

(b)

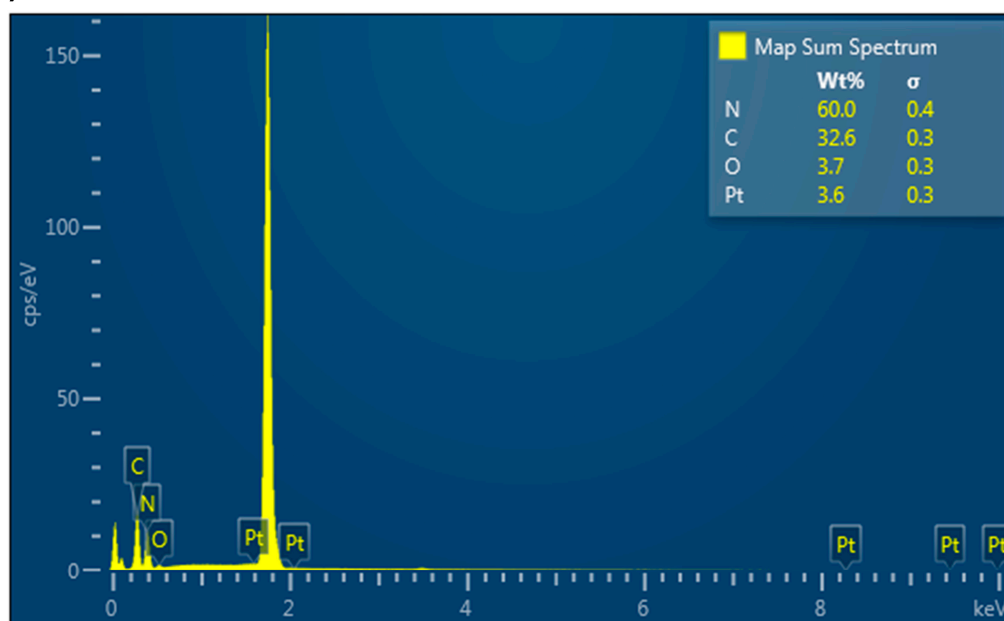

**Figure S5.** The Pt conten on the ACN/CCN-2 1st run (a) and 2nd run (b).
